# Supplementary material for: A robust model for cell type-specific interindividual variation in single-cell RNA sequencing data
Source: Springer Nature journal article supplement (doi:10.1038/s41467-024-49242-9), 2024-06-19
Supplement: MOESM3 [file 41467_2024_49242_MOESM3_ESM.pdf › 41467_2024_49242_MOESM3_ESM.pdf]

## **Description of Additional Supplementary Files**

**File name:** Supplementary Data 1

**Description:** GO enrichment analysis on the top 100 genes with significantly differentiated variance but no mean differentiation after Bonferroni correction. P-values were calculated by hypergeometric distribution and adjusted for multiple comparisons using the BH method.

**File name:** Supplementary Data 2

**Description:** GO enrichment analysis on the top 100 genes with significantly differentiated variance in OneK1K. P-values were calculated by hypergeometric distribution and adjusted for multiple comparisons using the BH method.
